# Supplementary material for: Co-differential genes between DKD and aging: implications for a diagnostic model of DKD
Source: PeerJ journal article supplement (doi:10.7717/peerj.17046), 2024-02-29

A

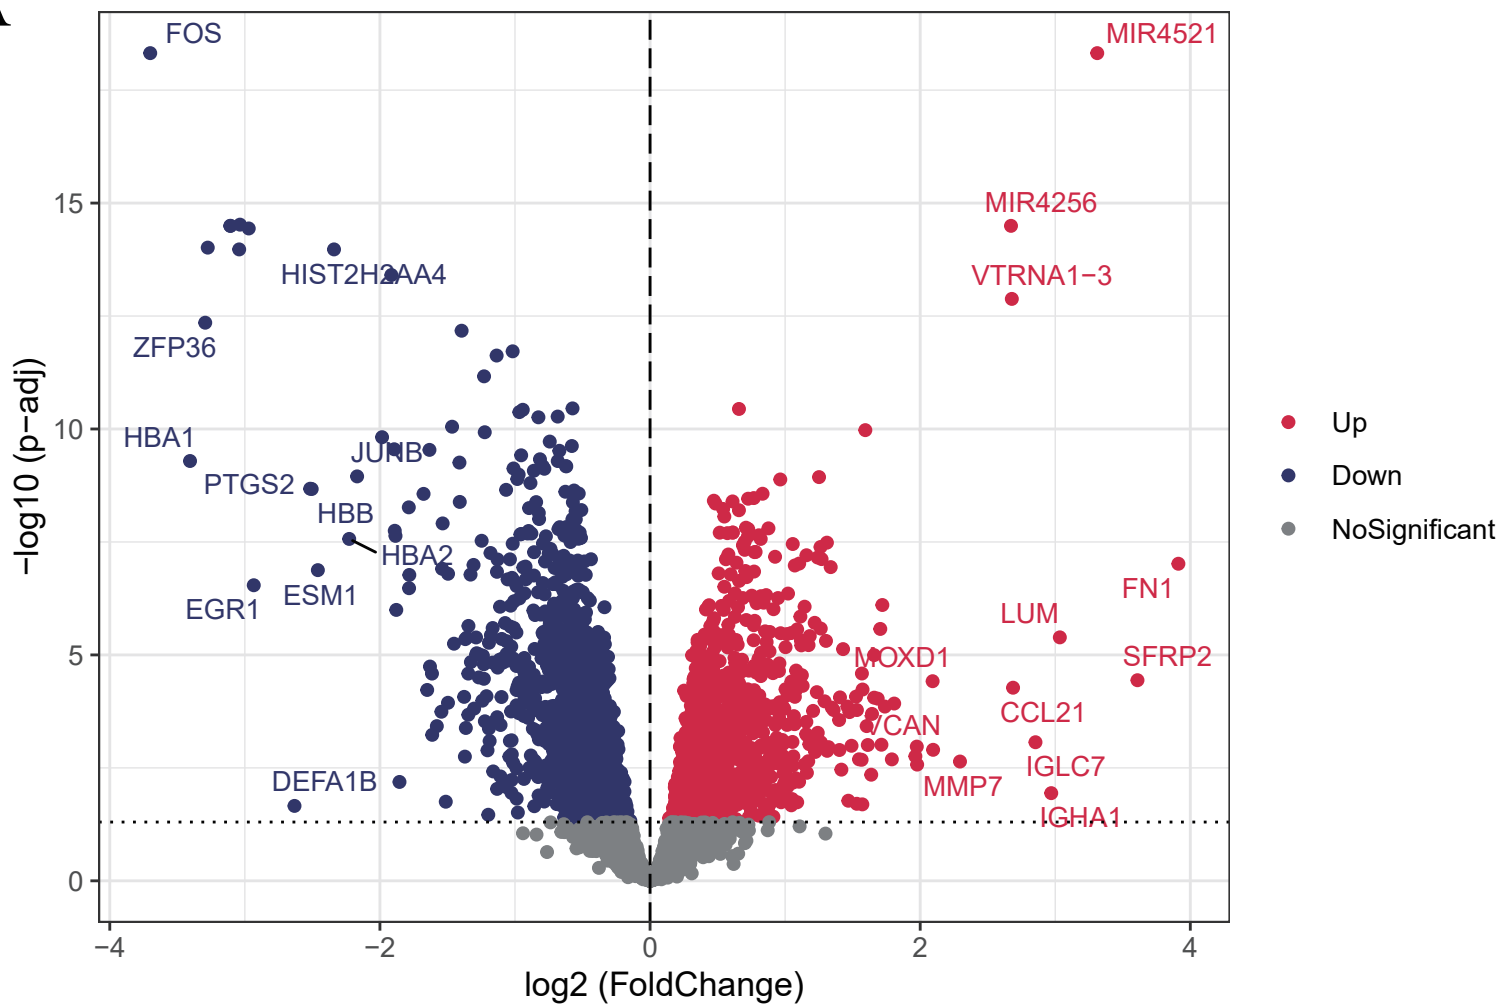

B

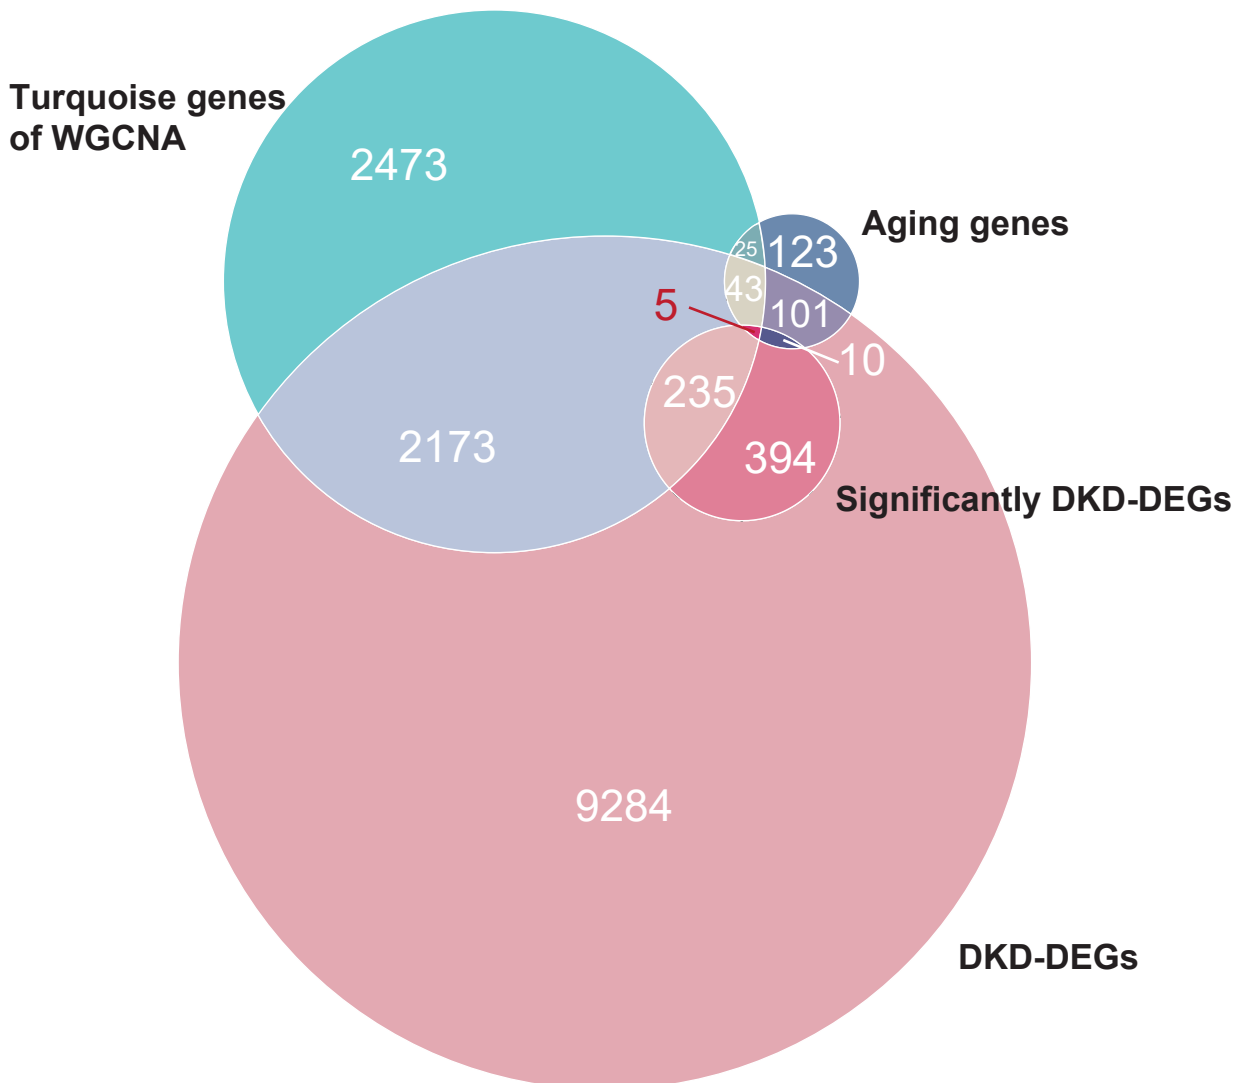

Supplement: FIGS1.pdf [file FIGS1.pdf]
