# Supplementary material for: Co-differential genes between DKD and aging: implications for a diagnostic model of DKD
Source: PeerJ journal article supplement (doi:10.7717/peerj.17046), 2024-02-29
Supplement: supplementary_files_1.pdf [file supplementary_files_1.pdf]

## 1. The RT-qPCR Raw data of mice kidney

| Sample | Gene   | Relative mRNA expression | Sample_Group |
|--------|--------|--------------------------|--------------|
| con-4  | Igf1   | 1.346242327              | Control      |
| con-5  | Igf1   | 1.136732555              | Control      |
| con-6  | Igf1   | 0.604725884              | Control      |
| DKD-10 | Igf1   | 0.250338054              | DKD          |
| DKD-12 | Igf1   | 0.38244429               | DKD          |
| DKD-13 | Igf1   | 0.342878822              | DKD          |
| con-4  | Hspa1a | 1.935573239              | Control      |
| con-5  | Hspa1a | 0.827491489              | Control      |
| con-6  | Hspa1a | 0.535015516              | Control      |
| DKD-10 | Hspa1a | 0.67886322               | DKD          |
| DKD-12 | Hspa1a | 0.505554316              | DKD          |
| DKD-13 | Hspa1a | 0.520592972              | DKD          |
| CON4   | Fos    | 0.398201277              | Control      |
| CON5   | Fos    | 1.56037763               | Control      |
| CON6   | Fos    | 1.451587879              | Control      |
| DKD10  | Fos    | 0.347063209              | DKD          |
| DKD12  | Fos    | 0.367217445              | DKD          |
| DKD13  | Fos    | 0.783321464              | DKD          |
| CON4   | Pck1   | 2.734622384              | Control      |
| CON5   | Pck1   | 1.15937589               | Control      |
| CON6   | Pck1   | 0.315412115              | Control      |
| DKD10  | Pck1   | 1.124233334              | DKD          |
| DKD12  | Pck1   | 0.677917811              | DKD          |
| DKD13  | Pck1   | 1.516208                 | DKD          |

## 2. Statistical analysis (Kolmogorov-Smirnov test, Homogeneity test of variance, T test and Mann-Whitney test) of the RT-qPCR data

### Kolmogorov-Smirnov test

| Gene   | sig.        |
|--------|-------------|
| Fos    | 0.178391461 |
| Hspa1a | 0.03095856  |
| Igf1   | .200*       |
| Pck1   | .200*       |

\*. This is the lower limit of true significance.

### Homogeneity test of variance

| Gene   | sig.        |
|--------|-------------|
| Fos    | 0.089364821 |
| Hspa1a | 0.042004514 |
| Igf1   | 0.069407758 |
| Pck1   | 0.165684596 |

**T test**

| Gene | Group   | Mean value  | T     | Sig. (2-tailed) |
|------|---------|-------------|-------|-----------------|
| Igfl | Control | 1.029233589 | 3.141 | 0.035           |
|      | DKD     | 0.325220389 |       |                 |
| Fos  | Control | 1.136722262 | 1.606 | 0.184           |
|      | DKD     | 0.499200706 |       |                 |
| Pck1 | Control | 1.403136796 | 0.396 | 0.712           |
|      | DKD     | 1.106119715 |       |                 |

**Mann-Whitney test**

| Gene   | Group   | Mean Rank   | Z        | Asymp. Sig. (2-tailed) | Exact sig. [2*(1-tailed sig.)] |
|--------|---------|-------------|----------|------------------------|--------------------------------|
| Hspa1a | Control | 4.666666667 | -1.52753 | 0.126630458            | .200 <sup>b</sup>              |
|        | DKD     | 2.333333333 |          |                        |                                |

*b. No corrected for ties.*
